# Supplementary material for: Diagnostic Accuracy of Clinical Examination and Imaging Findings for Identifying Subacromial Pain
Source: PubMed Central journal article supplement (PMC5147961; doi:10.1371/journal.pone.0167738), 2016-12-09
Supplement: pone.0167738.s001.pdf [file pone.0167738.s001.pdf]

## S1 Table:

**Contingency cell counts for clinical examination variables for a positive response to diagnostic injection of local anaesthetic into the subacromial bursa. (Table 4 data).**

| Clinical examination variables            | TP | FN | FP  | TN  |
|-------------------------------------------|----|----|-----|-----|
| Age > 50 yrs                              | 19 | 47 | 41  | 89  |
| Traumatic onset <sup>a</sup>              | 17 | 49 | 57  | 73  |
| Strain injury <sup>b</sup>                | 36 | 30 | 45  | 85  |
| Lateral shoulder pain <sup>c</sup>        | 13 | 53 | 26  | 104 |
| Anterior shoulder pain <sup>d</sup>       | 28 | 38 | 35  | 95  |
| Night pain disturbs sleep                 | 37 | 27 | 63  | 65  |
| Supraspinatus atrophy                     | 24 | 37 | 44  | 72  |
| Painful arc in abduction                  | 35 | 28 | 66  | 42  |
| Resisted abd. or ER pain                  | 50 | 16 | 104 | 22  |
| Resisted internal rotation pain           | 33 | 33 | 60  | 66  |
| Full passive ER (0°) <sup>†</sup>         | 65 | 1  | 116 | 14  |
| No <u>end-range</u> pain passive ER (90°) | 26 | 39 | 20  | 108 |
| Full passive ER (90°) <sup>†</sup>        | 61 | 5  | 103 | 23  |
| Hawkins-Kennedy test +                    | 38 | 27 | 87  | 36  |
| Drop arm +                                | 8  | 58 | 12  | 113 |
| Empty Can test + (pain or weakness)       | 57 | 9  | 106 | 17  |
| ERLS +                                    | 3  | 63 | 4   | 123 |

*Abbreviations.* TP, true positives; FN, false negative; FP, false positive; TN, true negatives; abd, abduction; ER, external rotation; ER, external rotation; ER(0°), external rotation performed in neutral; ER(90°), external rotation performed at 90° abduction; +, positive test result; ERLS, external rotation lag sign.

<sup>a-d</sup>See table of operational definitions below.

<sup>†</sup> Full passive external rotation defined by less than 30° deficit compared with the unaffected side.

Note: Total cell counts are less than 196 for some variables due to missing data.

| Operational Definitions for History Variables |                                                                                                                                                |
|-----------------------------------------------|------------------------------------------------------------------------------------------------------------------------------------------------|
| <sup>a</sup> Traumatic onset                  | Fall or high force impact through upper limb, or directly to shoulder region.                                                                  |
| <sup>b</sup> Strain injury                    | Lifting, reaching with load, push, pull, throwing motion.                                                                                      |
| <sup>c</sup> Lateral shoulder pain            | Pain located between the acromion (superiorly) and deltoid insertion (inferiorly).                                                             |
| <sup>d</sup> Anterior shoulder pain           | Pain located between the coracoid process (medially) and the anterior edge of the acromion (laterally) and bounded by the AC joint superiorly. |
| Superior shoulder pain                        | Pain located along the borders of the clavicle (anteriorly), spine of scapula (posteriorly) and bounded by the AC joint (laterally).           |
| Posterior shoulder pain                       | Pain located posteriorly, medial to the deltoid insertion and inferior to the spine of the scapula.                                            |
