# Supplementary material for: Diagnostic Accuracy of Clinical Examination and Imaging Findings for Identifying Subacromial Pain
Source: PubMed Central journal article supplement (PMC5147961; doi:10.1371/journal.pone.0167738), 2016-12-09
Supplement: pone.0167738.s002.pdf [file pone.0167738.s002.pdf]

## S2 Table:

**Contingency cell counts for imaging variables for a positive response to diagnostic injection of local anesthetic into the subacromial bursa.** (For Table 4 in manuscript)

| Imaging variables               | TP | FN | FP | TN  |
|---------------------------------|----|----|----|-----|
| <b>All participants (n=180)</b> |    |    |    |     |
| SSp calcium (XR or USS)         | 16 | 49 | 16 | 99  |
| SSp calcium (XR)                | 9  | 55 | 6  | 109 |
| SSp calcium (USS)               | 15 | 50 | 15 | 100 |
| SSp FTT (USS)                   | 7  | 58 | 2  | 113 |
| <b>Age ≥ 50 yrs (n= 49)</b>     |    |    |    |     |
| SSp calcium (XR or USS)         | 6  | 12 | 6  | 25  |
| SSp calcium (XR)                | 2  | 16 | 2  | 29  |
| SSp calc (USS)                  | 6  | 12 | 5  | 26  |
| SSp FTT (USS)                   | 5  | 13 | 2  | 29  |
| <b>Age &lt; 50 yrs (n=131)</b>  |    |    |    |     |
| SSp calcium (XR or USS)         | 10 | 37 | 10 | 74  |
| SSp calcium (XR)                | 7  | 39 | 4  | 80  |
| SSp calc (USS)                  | 9  | 38 | 10 | 74  |
| SSp FTT (USS)                   | 2  | 45 | 0  | 84  |

Abbreviations: TP, true positives; FN, false negatives; FP, false positives; TN, true negatives; SSp, supraspinatus; XR, x-ray; USS, diagnostic ultrasound scan; FTT, full thickness tear.

Note: contingency cell counts may not total 180 due to missing data.
