# Supplementary material for: Diagnostic Accuracy of Clinical Examination and Imaging Findings for Identifying Subacromial Pain
Source: PLOS journal article supplement (doi:10.1371/journal.pone.0167738), 2016-12-09
Supplement: S3 (10.1371/journal.pone.0167738.s003) [file journal.pone.0167738.s003]

### S3 Table:

**Contingency cell counts for combinations of clinical examination variables alone, and when combined with diagnostic ultrasound scan reports of supraspinatus pathology.** (For Table 5 in manuscript)

| Combinations of Clinical Variables     | TP | FN | FP | TN  |
|----------------------------------------|----|----|----|-----|
| <b>All Participants (n=180)</b>        |    |    |    |     |
| 1 clinical feature <sup>†</sup>        | 55 | 10 | 74 | 41  |
| 2 clinical features <sup>†</sup>       | 29 | 36 | 17 | 97  |
| 3 clinical features <sup>†</sup>       | 6  | 58 | 0  | 115 |
| <b>Age ≥50 years (n=49)</b>            |    |    |    |     |
| 1 of 3 clinical features: <sup>†</sup> | 15 | 3  | 19 | 12  |
| With SSp calcium on XR or USS          | 5  | 13 | 2  | 29  |
| With SSp FTT on USS                    | 5  | 13 | 2  | 29  |
| 2 of 3 clinical features: <sup>†</sup> | 8  | 10 | 1  | 30  |
| With SSp calcium on XR or USS          | 4  | 14 | 0  | 31  |
| With SSp FTT on USS <sup>‡</sup>       | 0  | 18 | 0  | 31  |
| 3 clinical features: <sup>†</sup>      | 1  | 17 | 0  | 31  |
| With SSp calcium on XR or USS          | 1  | 17 | 0  | 31  |
| With SSp FTT on USS <sup>‡</sup>       | 0  | 18 | 0  | 31  |
| <b>Age &lt;50 years (n=131)</b>        |    |    |    |     |
| 1 of 3 clinical features: <sup>†</sup> | 40 | 7  | 55 | 29  |
| With SSp calcium on XR or USS          | 10 | 37 | 6  | 78  |
| With SSp FTT on USS                    | 2  | 45 | 0  | 84  |
| 2 of 3 clinical features: <sup>†</sup> | 21 | 26 | 16 | 67  |
| With SSp calcium on XR or USS          | 7  | 40 | 2  | 81  |
| With SSp FTT on USS <sup>‡</sup>       | 0  | 47 | 0  | 83  |
| 3 clinical features: <sup>†</sup>      | 5  | 41 | 0  | 84  |
| With SSp calcium on XR or USS          | 2  | 44 | 0  | 84  |
| With SSp FTT on USS <sup>‡</sup>       | 0  | 46 | 0  | 84  |

Abbreviations: TP, true positives; FN, false negatives; FP, false positives; TN, true negatives; SSp, supraspinatus; XR, plain x-ray; USS, diagnostic ultrasound scan; FTT, full thickness tear.

<sup>†</sup> Represents the minimum number of positive clinical features (strain mechanism of injury, anterior shoulder pain and absence of symptom reproduction with passive range of motion external rotation (at 90° abduction)) required to fit the criterion.

<sup>‡</sup> no cases identified fitting the criterion, unable to calculate diagnostic accuracy statistics.

Note: contingency cell counts may not total 180 due to missing data.
